# Supplementary material for: Proteomic approach to understand the molecular physiology of symbiotic interaction between Piriformospora indica and Brassica napus
Source: PubMed Central journal article supplement (PMC5893561; doi:10.1038/s41598-018-23994-z), 2018-04-10
Supplement: 41598_2018_23994_MOESM1_ESM.pdf [file 41598_2018_23994_MOESM1_ESM.pdf]

# **Proteomic approach to understand the molecular physiology of symbiotic interaction between *Piriformospora indica* and *Brassica napus***

**Neeraj Shrivastava<sup>1,7</sup>, JiangLi<sup>2</sup>, Pan Li<sup>2</sup>, Archana Kumari Sharma<sup>3</sup>, Xingyuan Luo<sup>4</sup>, Sanling Wu<sup>5</sup>, Rashmi Pandey<sup>6</sup>, Qikang Gao<sup>2,5</sup>, Binggan Lou<sup>1\*</sup>**

<sup>1</sup>Institute of Biotechnology, Zhejiang University, Hangzhou 310058, China.

<sup>2</sup>Institute of Insect Sciences, Zhejiang University, Hangzhou 310058, China

<sup>3</sup>Centre for Environmental Science and Technology, Central University of Punjab, Bathinda 151001, India

<sup>4</sup>Hangzhou No. 14 High School, Hangzhou 310006, China

<sup>5</sup>Analysis Center of Agrobiolgy and Environmental Sciences, Zhejiang University, Hangzhou 310058, China

<sup>6</sup>Government Kanya Ashram School, Aara, Jashpur, Chhattisgarh, 496331, India

<sup>7</sup>Amity Institute of Microbial Technology, Amity University Uttar Pradesh Noida UP, 201303, India

**\* Correspondence to [bglou@zju.edu.cn](mailto:bglou@zju.edu.cn)**

## **SUPPLEMENTARY INFORMATION**

**Supplementary Table S1** Total proteins identified during the plant-fungal interaction.

**Supplementary Table S2** Significant differentially expressed proteins (DEPs) in control vs *P.indica* treated samples.

**Supplemental Table S3** Gene Ontology (GO) enrichment analyses of *P. indica* inhabited *B. napus* host's differential proteins.

**Supplementary Table S4** List of DEPs proteins involved in Protein-protein interaction (PPI) network

**(Supplementary Table 1-4 is provided separately in MS excel format)**

**Supplementary Table S5** List of DEPs showing role in different metabolic and synthesis pathways

**Supplementary Figure S1** Tentative model of pre-symbiotic signaling cascade during recruitment of *P. indica* at rapeseed root tissue

**Supplementary file S1:** Summary - result statistics of protein identification.

| S.N | KEGG map no. | Pathways                                    | Differentially expressed Proteins                                     | UniProt Accession |
|-----|--------------|---------------------------------------------|-----------------------------------------------------------------------|-------------------|
| 1.  | 00052        | Glucose Metabolism                          | Acid beta-fructofuranosidase (3.2.1.26)                               | MAF6E3            |
| 2.  | 00061        | Fatty Acid Metabolism                       | 3-oxoacyl-[acyl-carrier-protein] (FabB) (2.3.1.41)                    | A0A0D3E4R7        |
|     |              |                                             | 3-hydroxyacyl-[acyl-carrier-protein] dehydratase FabZ-like (4.2.1.59) | M4CPB4            |
| 3.  | 00220        | Arginine Biosynthesis                       | N-acetyl-gamma-glutamyl-phosphate reductase (1.2.1.38)                | A0A078ILF0        |
|     |              |                                             | Aminoacylase 1 (3.5.1.14)                                             | A0A0D3CNP2        |
| 4.  | 00230        | Purine Metabolism                           | Adenylosuccinate synthase (6.3.4.4)                                   | A0A078EYR1        |
| 5.  | 00250        | Alanine, Aspartate and Glutamate Metabolism | Adenylosuccinate synthase (6.3.4.4)                                   | A0A078EYR1        |
| 6.  | 00500        | Starch and Sucrose Metabolism               | Acid beta-fructofuranosidase (3.1.2.26)                               | MAF6E3            |
| 7.  | 00511        | Other Glycan Degradation                    | Alpha Mannosidase (2 man $\alpha$ 1)                                  | A0A078CNZ6        |
| 8.  | 00564        | Glycerophospholipid Metabolism              | Glycerophosphodiester phosphodiesterase (3.1.4.46)                    | M4ECA0            |
| 9.  | 00780        | Biotin Metabolism                           | 3-oxoacyl-[acyl-carrier-protein] (FabB) (2.3.1.41)                    | A0A0D3E4R7        |
| 10. | 00940        | Phenylpropanoid Biosynthesis                | Peroxidase                                                            | C7E9R5            |

**Supplementary Table S5.** List of DEPs showing role in different metabolic and synthesis pathways

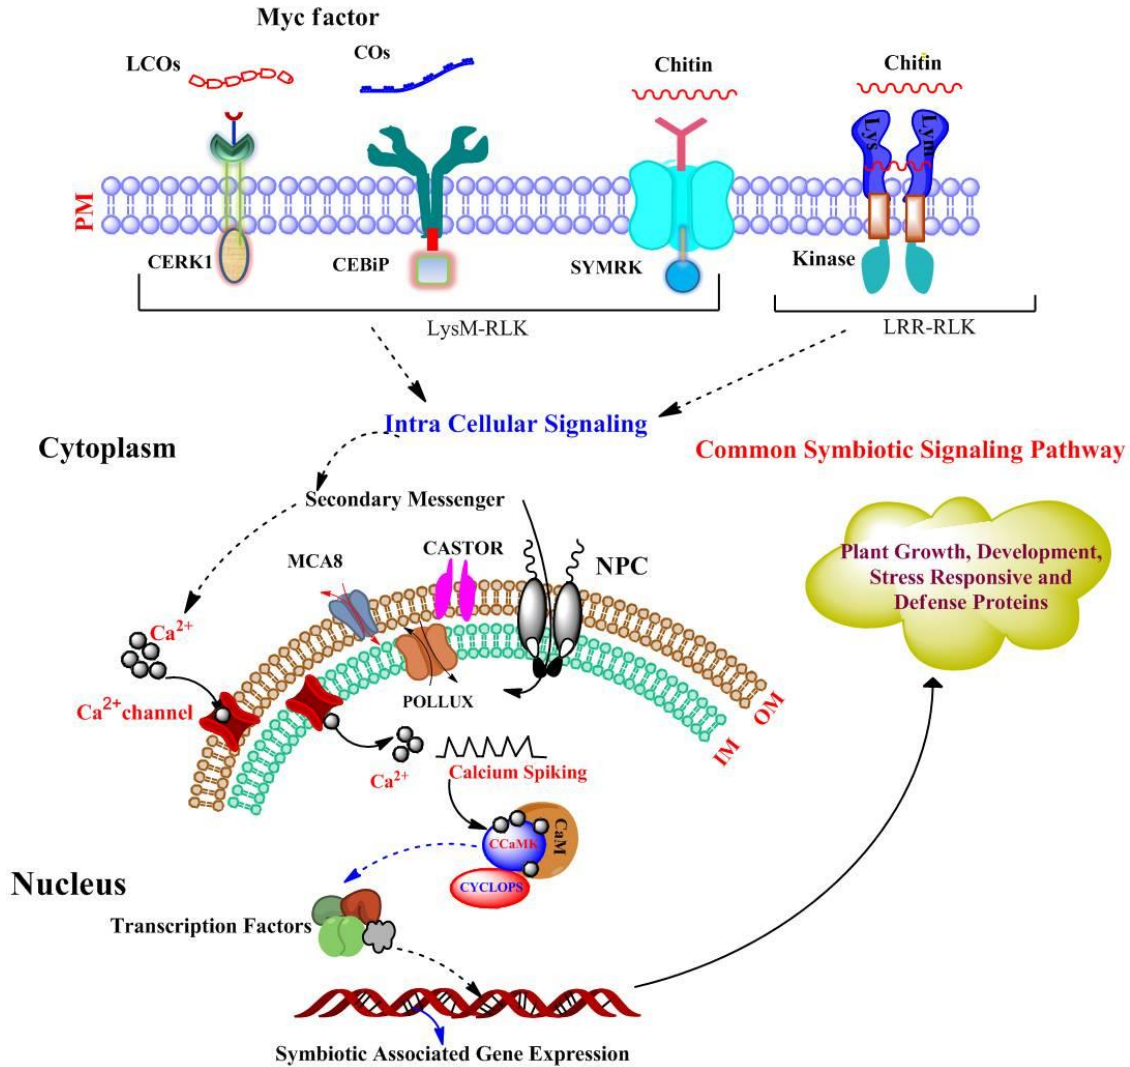

**Supplementary Figure S1 Tentative model of pre-symbiotic signaling cascade during recruitment of *P. indica* at rapeseed root tissue:** Microbe-associated molecular patterns (MAPS) on plasma membrane are responsible for recruiting different cytoplasmic regulatory receptor kinases. Germinated spores secrete chitin tetramers, CO4/Myc factors/LCOs. These ligands perception is mediated by LRR- receptor kinases (SYMRK), LysM receptors or receptor like proteins which trigger the recruitment of related SERK and CERK1. The LCO perception at the plasma membrane generate signal for nuclear Ca<sup>2+</sup>-spiking vibrations. SYMRK and others generate second messenger and help in releasing calcium from the nuclear membranes. These events lead to initiate the nuclear calcium spiking response in nuclear membrane and mediated by upstream SYMRK/DMI2, CASTOR/POLLUX/DMI1) or downstream (CCaMK/DMI3, CYCLOPS/IPD3 etc.) transcription complexes. These factors induce the gene expression, which lead to arbuscule development which is major determinant of quantitative nutrient transfer. Further, expression of genes lead to form proteins engaged in overall growth and development of plant<sup>28,29,30,31</sup>.

# Supplementary file S1: Summary - Result statistics

(exported from PEAKS studio 8.0)

## A) Protein identification

**Table 1. Statistics of data.**

|                       |        |
|-----------------------|--------|
| Number of MS scans    | 24300  |
| Number of MS/MS scans | 271975 |

**Table 2. Result filtration parameters.**

|                          |      |
|--------------------------|------|
| Peptide -10lgP           | ≥20  |
| Protein -10lgP           | ≥20  |
| Proteins unique peptides | ≥0   |
| De novo ALC Score        | ≥50% |

**Table 3. Statistics of filtered result.**

|                                |                                |
|--------------------------------|--------------------------------|
| Peptide-Spectrum Matches       | 82303                          |
| Peptide sequences              | 18357                          |
| Protein groups                 | 4410                           |
| Proteins                       | 8123                           |
| Proteins (#Unique Peptides)    | 980 (>2); 814 (=2); 2525 (=1); |
| FDR (Peptide-Spectrum Matches) | 0.8%                           |
| FDR (Peptide Sequences)        | 3.2%                           |
| FDR (Protein)                  | 5.5%                           |
| De Novo Only Spectra           | 109,003                        |

## B) Label-free quantification

Figure 1: Protein profile heatmap (Cell colour represents the log<sub>2</sub>(ratio) to the average area across different samples)

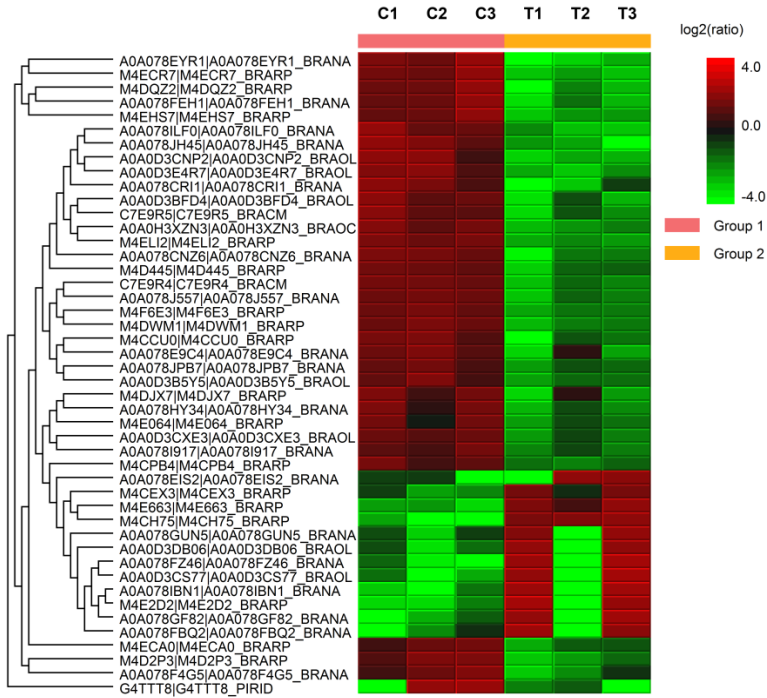

Figure 2. The volcano plot for proteins.

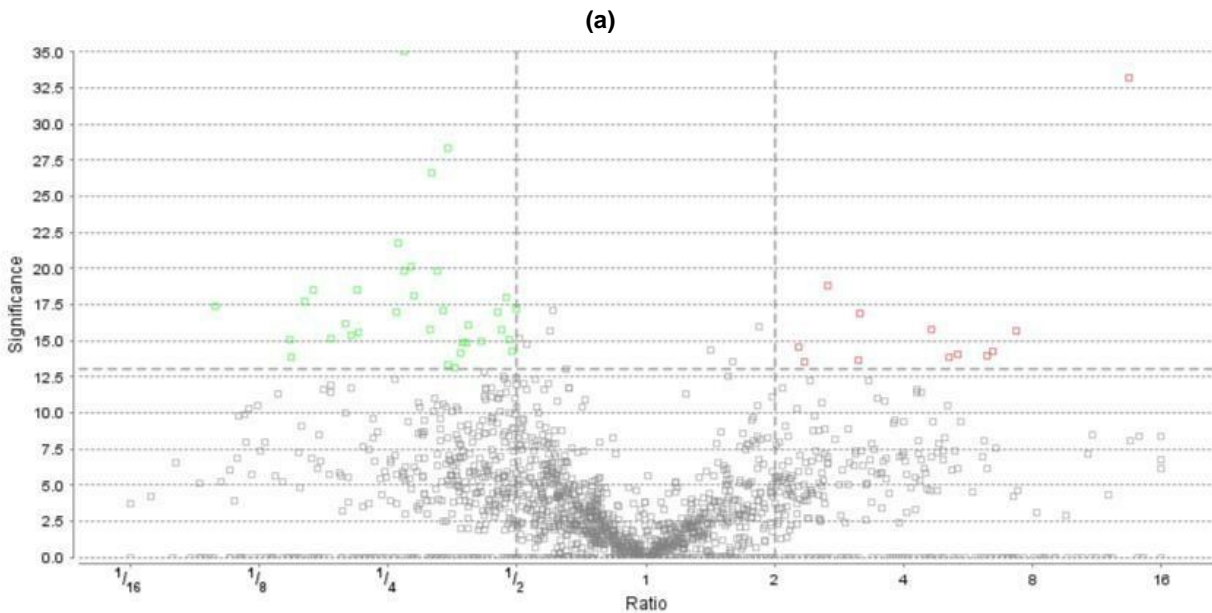

Figure 3. The distribution of feature vector ratio: (a) By quality. (b) By intensity. 🌐

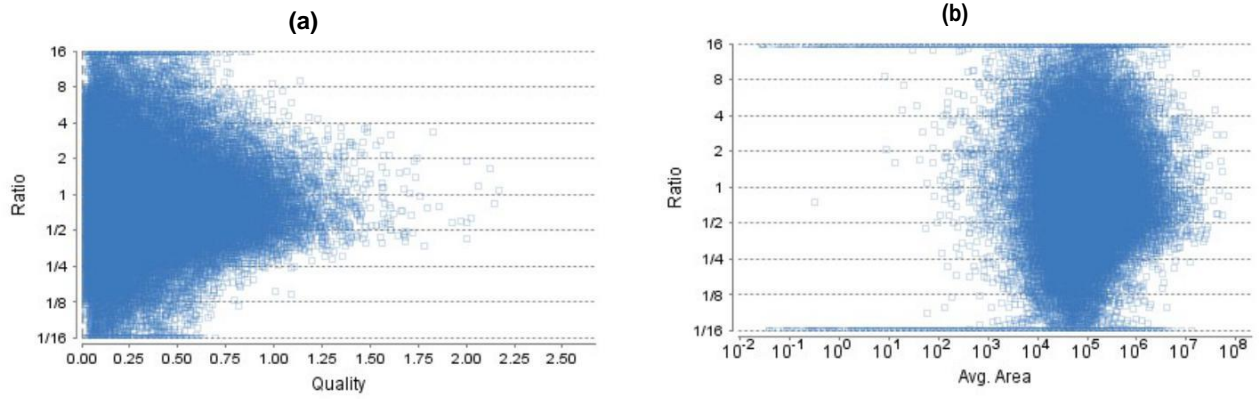

Figure 4. (a) RT shift distribution; (b) M/Z shift distribution. 🌐

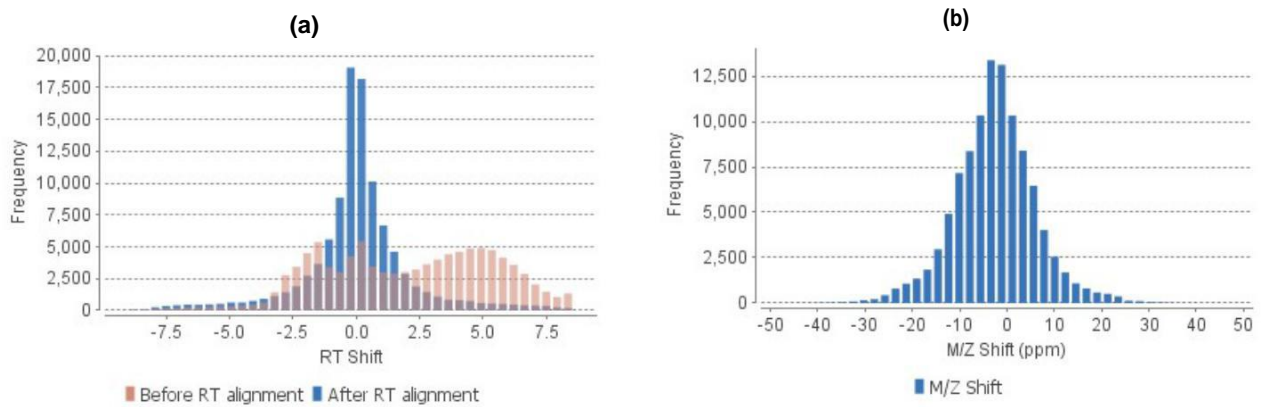

Table 1. Result filtration parameters.

|                           |         |
|---------------------------|---------|
| Retention time            | ≥0      |
| Retention time            | ≤150    |
| Feature significance      | ≥0      |
| Feature fold change       | ≥1      |
| Quality                   | ≥0      |
| Avg. Area                 | ≥0E0    |
| Charge                    | ≥1      |
| Charge                    | ≤10     |
| Confident sample number   | ≥1      |
| With peptide ID           | true    |
| Protein significance      | ≥13     |
| Protein fold change       | ≥2      |
| Significance method       | ANOVA   |
| Confident unique supports | ≥1      |
| Normalization             | Use TIC |

Table 2. Statistics of filtered result.

|                         |       |
|-------------------------|-------|
| Features                | 44159 |
| Features with ID        | 27217 |
| Feature vectors         | 11364 |
| Feature vectors with ID | 11364 |
| Protein groups          | 46    |

Table 3. Search Parameters

Quantification type: Label free quantification  
 Mass Error Tolerance: 25.0 ppm  
 Retention Time Shift Tolerance: 8.0 min  
 Dependent on PID: 19  
 FDR Threshold: 1%  
 Samples: 6 samples in 2 groups  
 : CK1 CK2 CK3 : T1 T2 T3  
 Reference Sample: CK2 (auto detected)  
 Training Samples: CK2, T2 (auto detected)
